# Supplementary material for: RETRACTED: Downregulation of hsa_circ_0001836 Induces Pyroptosis Cell Death in Glioma Cells via Epigenetically Upregulating NLRP1
Source: Frontiers journal article supplement (doi:10.3389/fonc.2021.622727), 2021-03-31
Supplement: Table_1.DOCX [file Table_1.DOCX]

1 TCAGTGTCAGAATTGCACTGTAGGACACCAGTTGGTGTCTAGAGAGTTGGTGCCAGAACT

|:|||||:|||||||:|:|||||||:|::|||||||||:|||||||||||||::||||:|

1 TTAGTGTTAGAATTGTATTGTAGGATATTAGTTGGTGTTTAGAGAGTTGGTGTTAGAATT

61 GGCTGGTGTGAGGAGGAAAAAAAGCCCACACAGCCCTCCTCCAGGCCATTCCTCCCGCTA

||:|||||||||||||||||||||:::|:|:||:::|::|::|||::|||::|::++:||

61 GGTTGGTGTGAGGAGGAAAAAAAGTTTATATAGTTTTTTTTTAGGTTATTTTTTTCGTTA

121 CATGGAGTCTCACGGTCCTTCACGGAGTGCTCAGAGCCTCCCGATCATCCCACTTTTAGC

:|||||||:|:|++||::||:|++|||||:|:||||::|::++||:||:::|:||||||:

121 TATGGAGTTTTACGGTTTTTTACGGAGTGTTTAGAGTTTTTCGATTATTTTATTTTTAGT

181 ACAGCACTTTTCCACTTCTGGTCAATCTGATATTAGAATGTCCTACAATGTGCTTATTAG

|:||:|:||||::|:||:||||:|||:||||||||||||||::||:||||||:|||||||

181 ATAGTATTTTTTTATTTTTGGTTAATTTGATATTAGAATGTTTTATAATGTGTTTATTAG

241 CCATTTTTTAAAACTAACATTTATAAAATTTATTTAGGCCAGGCACGGAGGCTCACACCT

::|||||||||||:|||:||||||||||||||||||||::|||:|++||||:|:|:|::|

241 TTATTTTTTAAAATTAATATTTATAAAATTTATTTAGGTTAGGTACGGAGGTTTATATTT

301 GTAATCCCAACATTTCGGGAGGCCGAAGTGGGCGGATCACCTCGGATCAGACTGGCTAAC

|||||:::||:||||++|||||:++|||||||++|||:|::|++|||:|||:|||:|||:

301 GTAATTTTAATATTTCGGGAGGTCGAAGTGGGCGGATTATTTCGGATTAGATTGGTTAAT

M>>>>>>>>>>>>>>>>>>>>>>

U>>>>>>>>>>>>>>>>>>>>>>>>

361 ATGGTGAAACCCCATCTCTACTAAAAATACAAAACAATTAGCCAGGCGTGGTGGTGAGTG

|||||||||::::||:|:||:||||||||:||||:||||||::|||++||||||||||||

361 ATGGTGAAATTTTATTTTTATTAAAAATATAAAATAATTAGTTAGGCGTGGTGGTGAGTG

M<<<<<<<<<<<<<<

U<<<<<<<<<<<<<<

421 ACTGTAATCCCAACTGCCCAGGAAGCTGGGCTGATGCAGGAGAATCGCTGGAACCCAGGA

|:||||||:::||:||:::||||||:||||:|||||:||||||||++:|||||:::||||

421 ATTGTAATTTTAATTGTTTAGGAAGTTGGGTTGATGTAGGAGAATCGTTGGAATTTAGGA

<<<<<<<<

<<<<<<<<<

481 GGTGGAGGGAGCTTGCAGTGAGCCGAGATCTTGCCACTGCACTCCAGCCTGGGAAAGAGA

|||||||||||:|||:||||||:++||||:|||::|:||:|:|::||::|||||||||||

481 GGTGGAGGGAGTTTGTAGTGAGTCGAGATTTTGTTATTGTATTTTAGTTTGGGAAAGAGA

*Comments：

Upper row: Original sequence

Lower row: Bisulfite modified sequence

(For display, assume all CpG sites are methylated)

++ CpG sites

:::: Non-CpG 'C' converted to 'T'

M >>>> Left methylated-specific primer

M <<<< Right methylated-specific primer

U >>>> Left unmethylated-specific primer

U <<<< Right unmethylated-specific primer

**Primer sequence**

| Primer | | Primer sequence（5`--3`） | product length（bp） |
| --- | --- | --- | --- |
| H-NLRP1 M | Forward | ATTTTAATATTTCGGGAGGTCG | 125 |
| reverse | ATTACAATCACTCACCACCACG |
| H-NLRP1 U | Forward | AATTTTAATATTTTGGGAGGTTGA | 127 |
| reverse | AATTACAATCACTCACCACCACA |

**The sequence information of methylation sits of NLRP1 promoter region**
